# Supplementary material for: Amination and dehydration of 1,3-propanediol by hydrogen transfer: reactions of a bio-renewable platform chemical
Source: Royal Society of Chemistry journal article supplement (doi:10.1039/c1cy00339a), 2011-10-17

## Amination and Dehydration of 1,3-Propanediol by Hydrogen Transfer: Reactions of a Bio-Renewable Platform Chemical

Sophie D. Lacroix, Annie Pennycook, Shifang Liu, Thomas T. Eisenhart and Andrew C. Marr

### Synthetic Procedures.

<sup>1</sup>H NMR were recorded at 25 °C using a Bruker DPX300 or DPX500 spectrometer. Catalysts **1** and **2** were prepared by a modification of a literature procedure for [Cp\*IrCl<sub>2</sub>(NHC)] complexes.<sup>1</sup> Filtration through celite had to be repeated many times to remove contamination by silver. Analysis of **2**.

<sup>1</sup>H NMR (500 MHz, CDCl<sub>3</sub>): δ (ppm) = 7.10 (d, <sup>3</sup>J<sub>HH</sub> = 2.0 Hz, 1H, CH imidazole), 6.95 (d, <sup>3</sup>J<sub>HH</sub> = 2.0 Hz, 1H, CH imidazole), 4.64 (m, 1H, *n*-Bu), 3.99 (s, 3H, NCH<sub>3</sub>), 2.05 (m, 1H, *n*-Bu), 1.68 (m, 2H, *n*-Bu), 1.58 (s, 15H, Cp\*), 1.49 (m, 2H, *n*-Bu), 0.995 (t, <sup>3</sup>J<sub>HH</sub> = 7.4 Hz, 3H, *n*-Bu).

Anal. Calcd for C<sub>18</sub>H<sub>29</sub>Cl<sub>2</sub>IrN<sub>2</sub>: C, 40.29; H, 5.45; N, 5.22. Found: C, 40.34; H, 5.58; N, 5.08.

EI + Ms (VG Autospec X). *m/z*: 537 [M]<sup>+</sup>.

### Catalytic Procedures.

The amination of 1,3-propanediol was performed as detailed previously,<sup>2</sup> Employing the quantities detailed in the manuscript (Table 1).

**Work-up of the toluene reactions (Table 1 and 2, entries 1 and 2):** The reaction mixture was cooled to room temperature and diluted with CH<sub>2</sub>Cl<sub>2</sub> (2mL). Salts and catalyst were removed by filtration through a plug of silica. The solvent was removed *in vacuo*. TLC (ethyl acetate / hexane 1:3) revealed 6 products, presumed to be aniline, 1,3-propanediol, **3**, **4**, **5** and an unknown. The <sup>1</sup>H NMR analysis of the composition of the toluene solution detailed Tables 1 and 2 (entry 2) was verified by GC/MS (using a 30 m BP5 capillary column), the conversion was calculated (values calculated by <sup>1</sup>H NMR in parenthesis) as 68% (71) and the composition as 90% (89) mono-amine **3**, 8% (8) di-amine **4**, 2% (3) *N*-propyl aniline **5**. *N*-allyl aniline was also detected in solution, this was not apparent by NMR, and is assumed to be the unknown detected by TLC.

**Work-up of the N<sub>1,8,8</sub>NTf<sub>2</sub> reactions (Table 1 and 2, entries 3 – 6):** The reaction was cooled to room temperature and quenched by adding H<sub>2</sub>O (1.0 mL). The product was extracted with hexane / diethyl ether (3:1, 6 x 5.0 mL) at 0 °C. The mixture is triphasic and composition must be cross referenced against the composition of the crude ionic liquid solution to avoid erroneous results due to selective extraction.

## Dehydration in the Absence of Aniline.

The procedure was adapted from the literature procedure<sup>2</sup> for *N*-alkylation by removing the amine from the reaction solution. Reactions were carried out in sealed tubes under a nitrogen atmosphere. A solution was prepared of K<sub>2</sub>CO<sub>3</sub> (0.0210 g), toluene (1.5 mL), 4Å molecular sieves (0.0900g), catalyst (0.0150 millimoles), and 1,3-propanediol (0.1080 mL). A stir bar was added, the top was crimped shut, and the vessel was purged with nitrogen before being put in an oil bath at 115 °C. After running for 24 hours, the solution was allowed to cool and settle. Trap-to-trap vacuum distillation (TTVD) was used to concentrate the product solution. GC/MS was used to analyze the products of reaction.

## GC Trace:

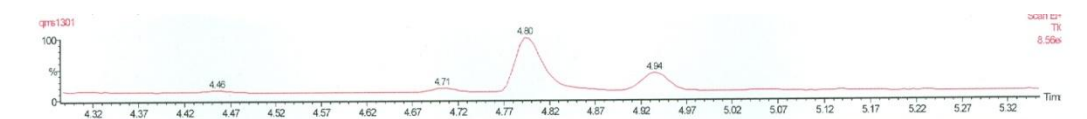

## MS Analyses:

Major species, retention time 4.80:

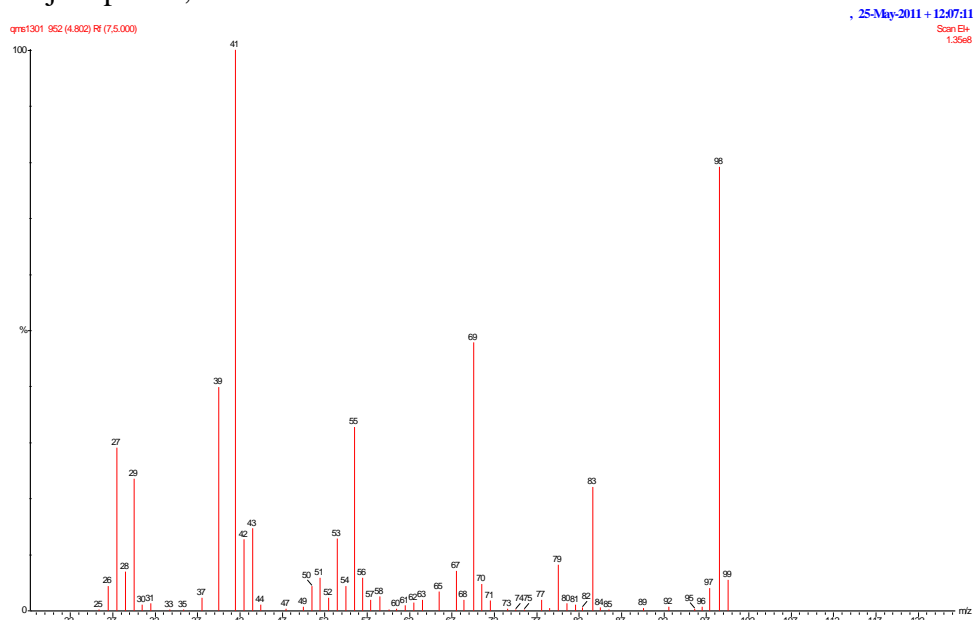

Predicted spectrum for 2-methylpentenal:

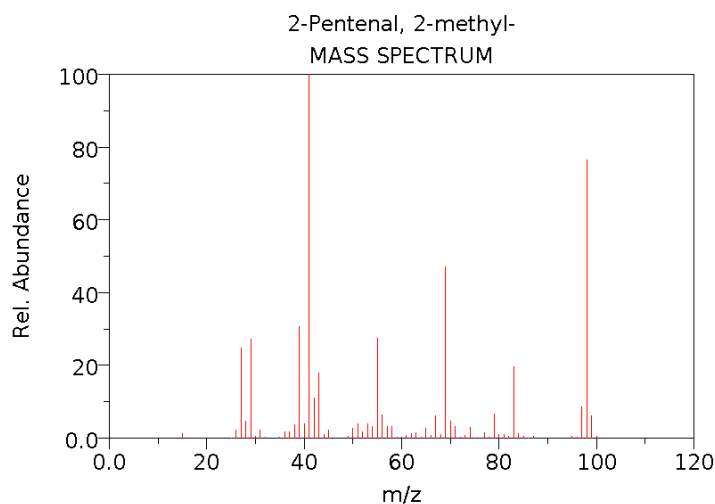

### Minor Species, retention time 4.94:

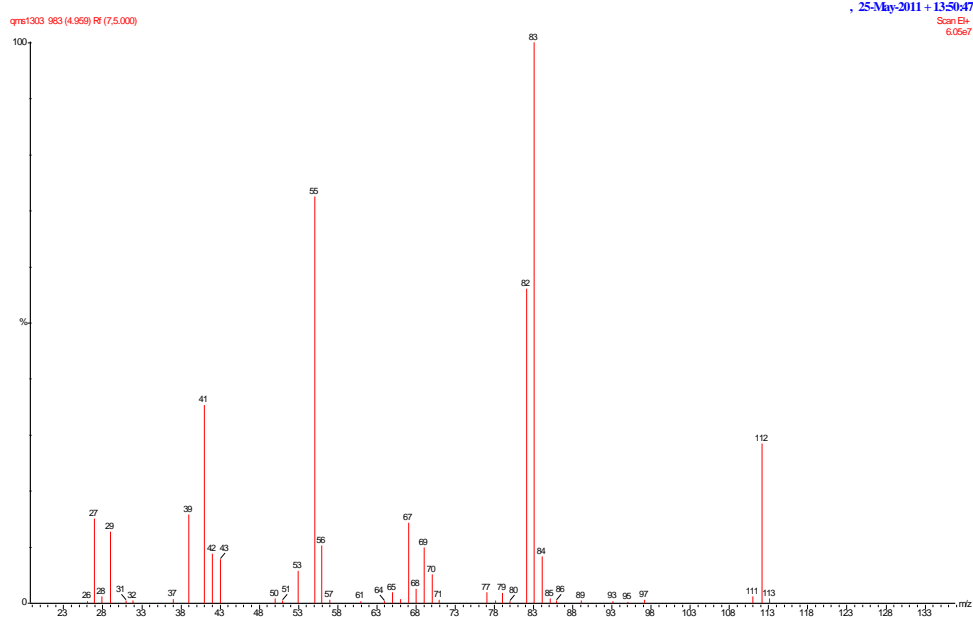

### Trace Species, retention time 4.71:

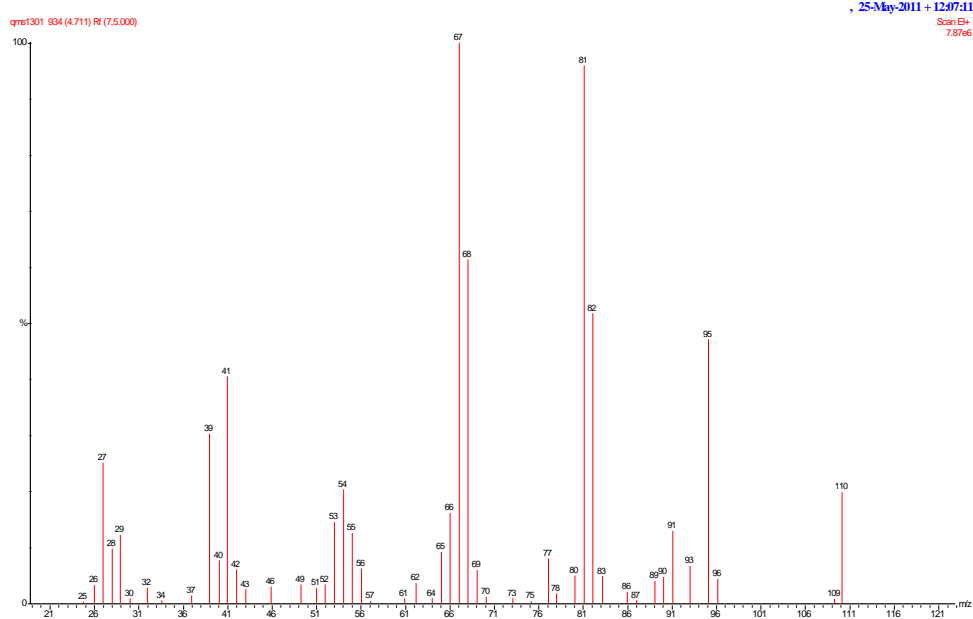

### References

1. Rosa Corberán, M. Sanaú and E. Peris, *J. Am. Chem. Soc.* 2006, **128**, 3974 – 397.
2. S. Liu, M. Rebros, G. Stephens, A. C. Marr, *Chem. Commun.* 2009, 2308 – 2310 and supplementary data.

### Appendix: NMR Spectra of Products, predominantly 3, 5 and 4 respectively.

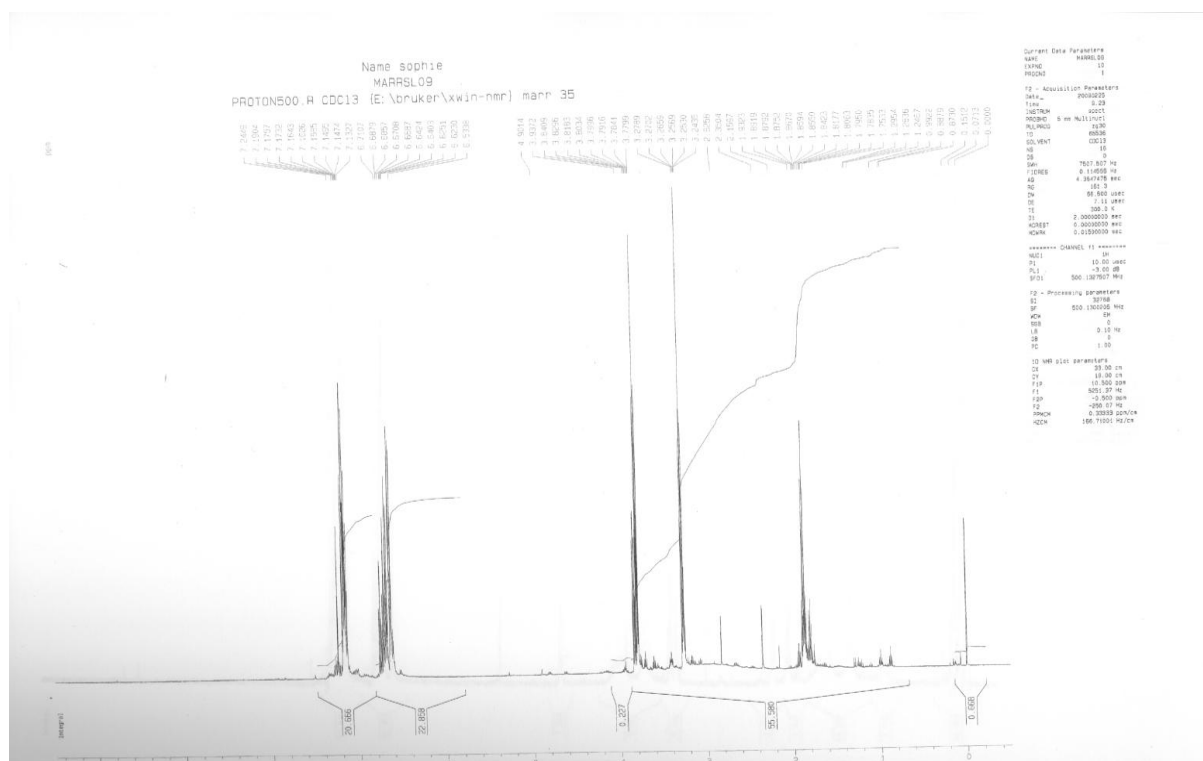

NMR of products of the reaction of aniline and 1,3-propanediol under conditions for Table 1 and 2, entry 2.

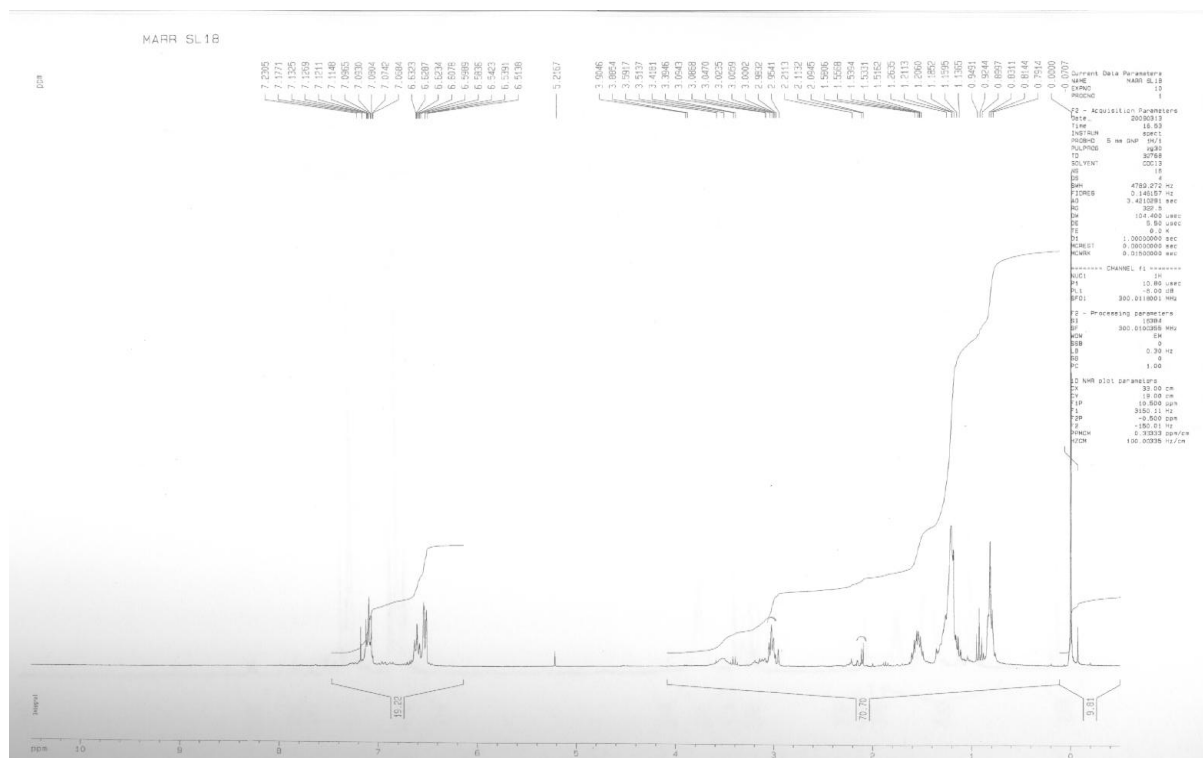

NMR of products of the reaction of aniline and 1,3-propanediol under conditions for Table 1 and 2, entry 5.

Jack Doherty/Elva/keva  
2-1

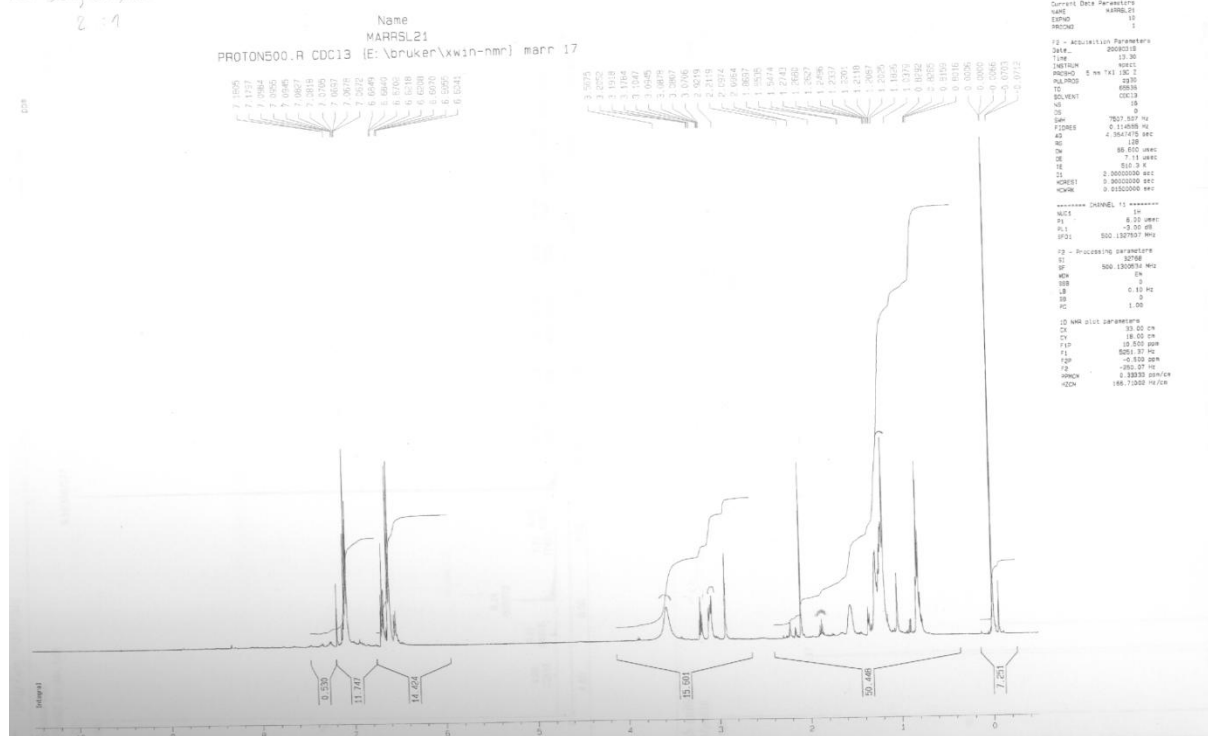

Supplement: c1cy00339a.pdf [file c1cy00339a.pdf]
